# Supplementary material
Source: Springer Nature journal article supplement (https://www.springermedizin.de/resource/supplementary/12893_2013_467_MOESM1_ESM.pdf/9512498)

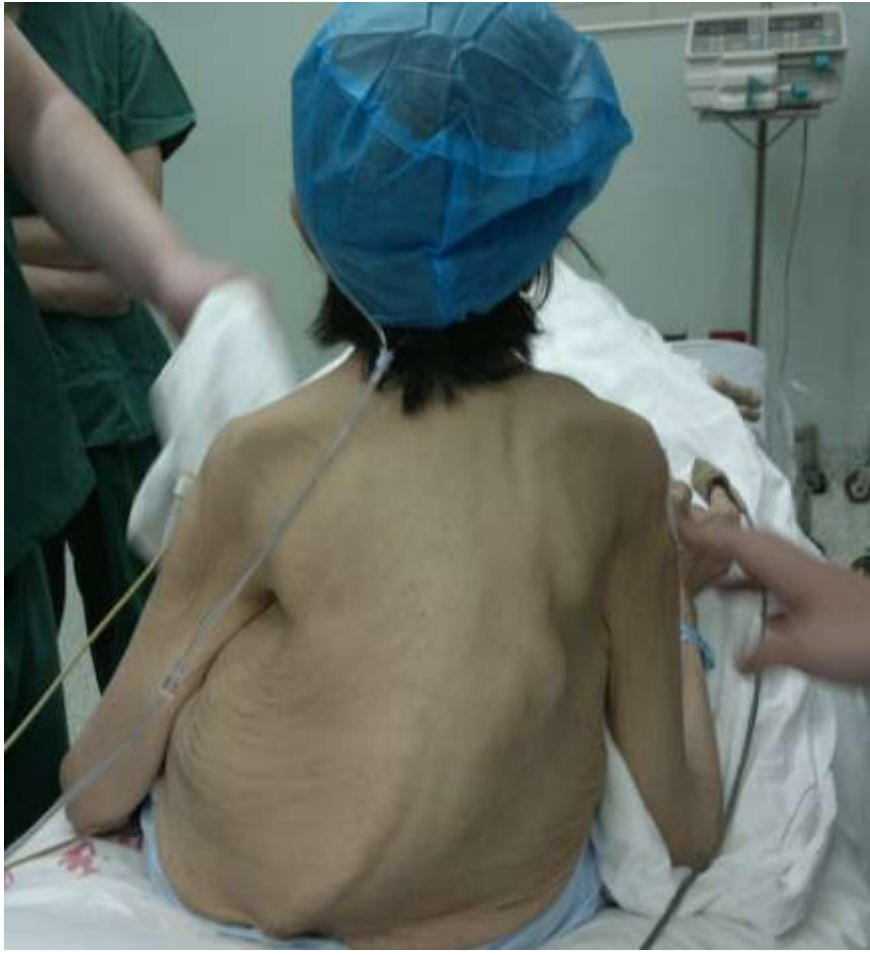

Supplement: MOESM1 [file 9512498]
